# Supplementary material for: Clinical diagnostic value of liquid chromatography-tandem mass spectrometry method for primary aldosteronism in patients with hypertension: A systematic review and meta-analysis
Source: Frontiers journal article supplement (doi:10.3389/fendo.2022.1032070), 2022-11-18
Supplement: Data_Sheet_1.ZIP [file Data_Sheet_1.ZIP]

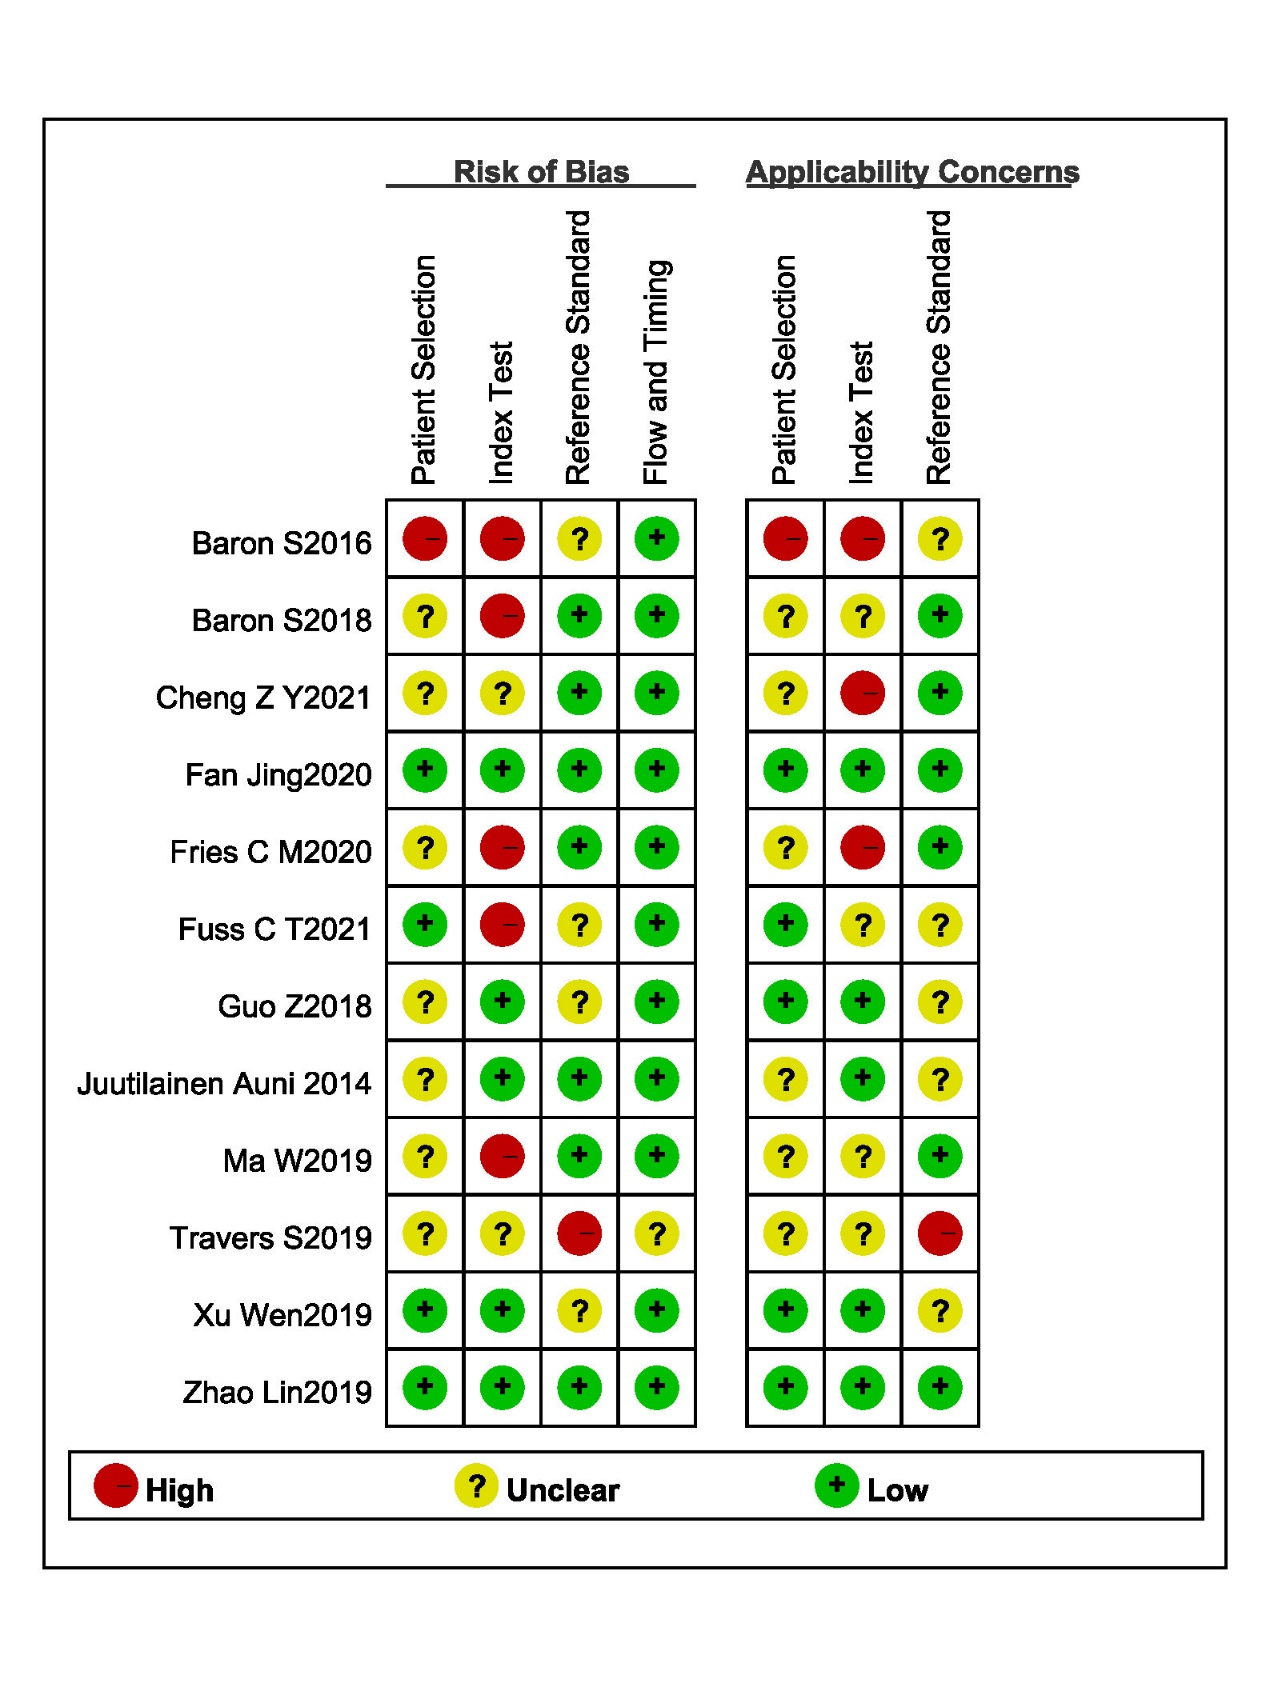


**Supplementary Figure 1**. Methodological quality summary for included studies


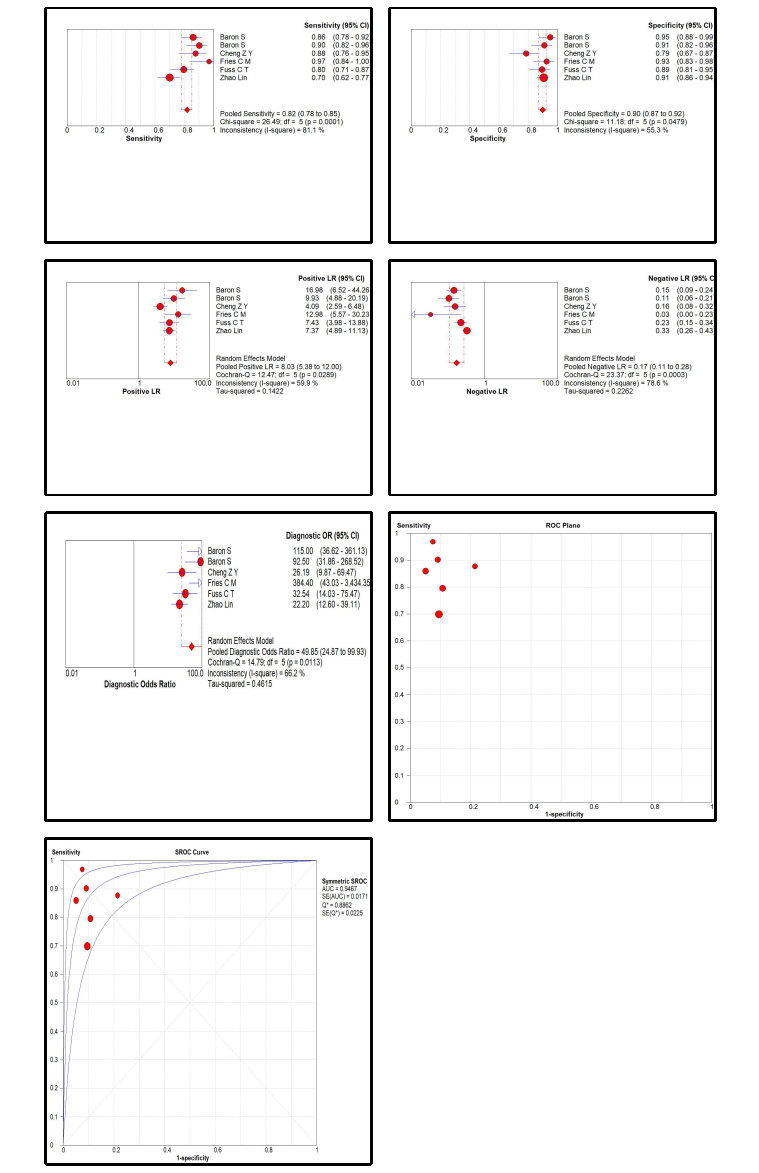


**Supplementary Figure 2.** Forest plots of sensitivity, specificity, PLR, NLR, DOR, SROC curve and ROC Plane for PAC in the diagnosis of PA.


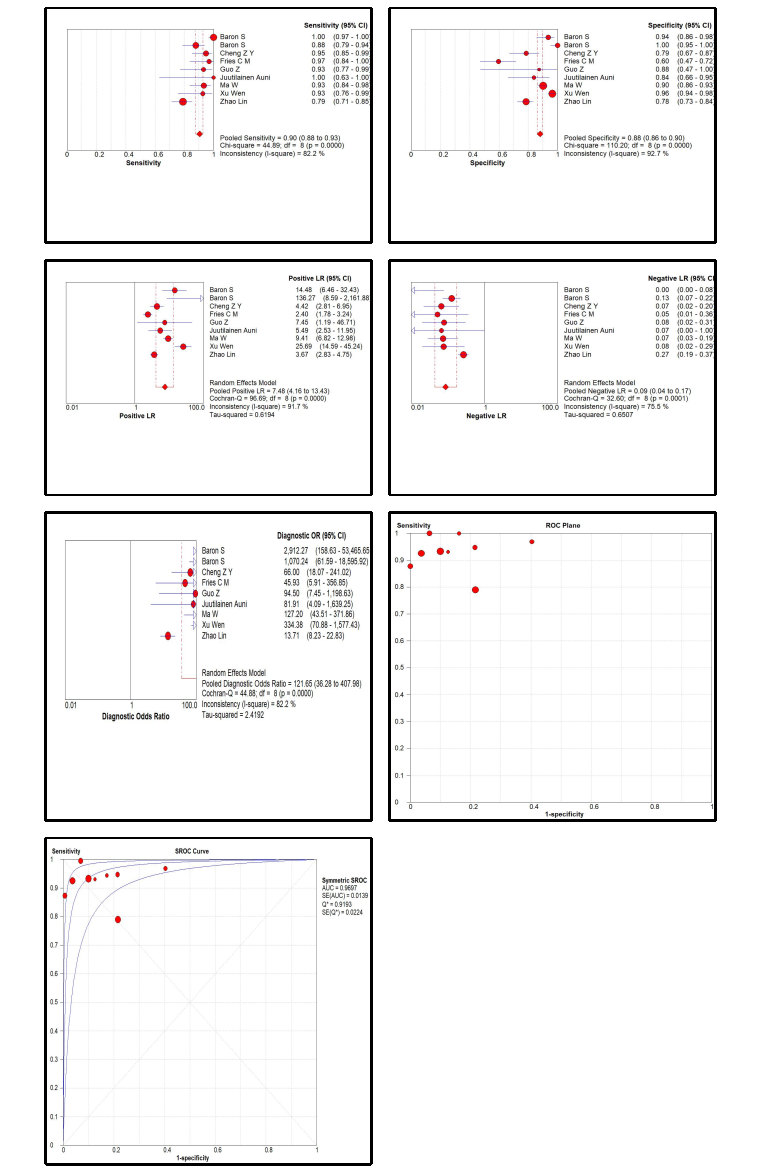


**Supplementary Figure 3.** Forest plots of sensitivity, specificity, PLR, NLR, DOR, SROC curve and ROC Plane for ARR in the diagnosis of PA.


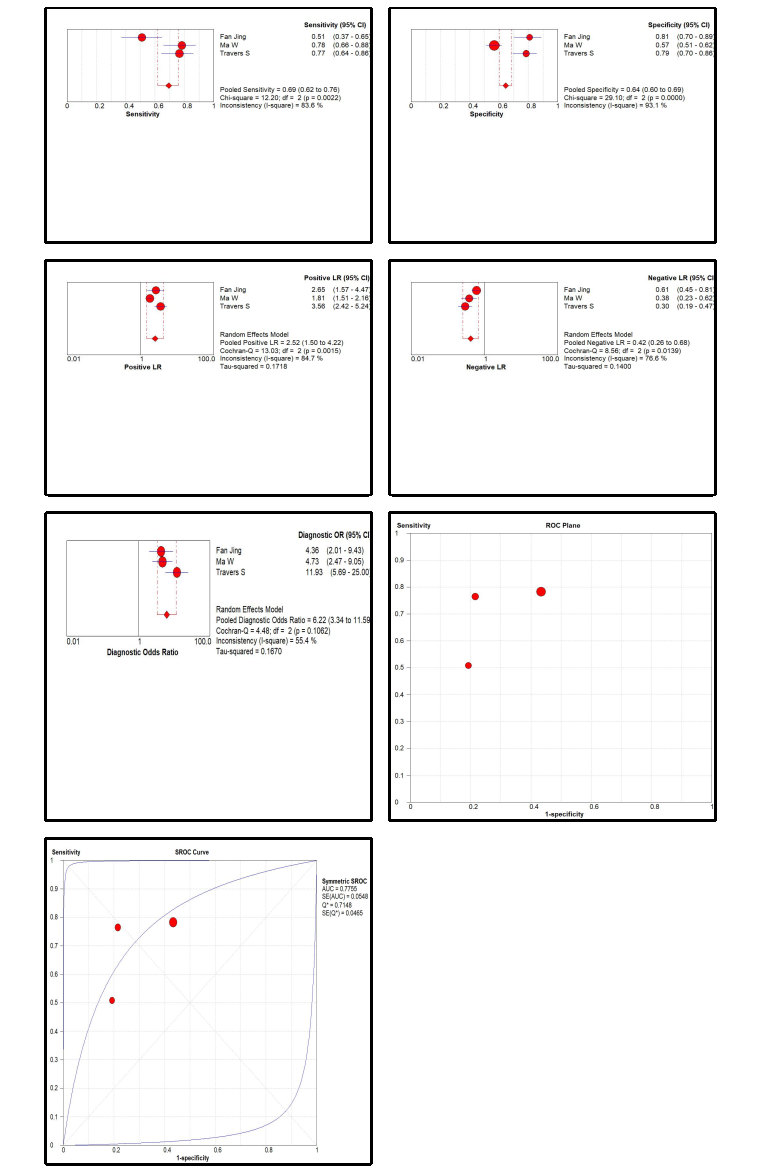


**Supplementary Figure 4.** Forest plots of sensitivity, specificity, PLR, NLR, DOR, SROC curve and ROC Plane for UAC in the diagnosis of PA.


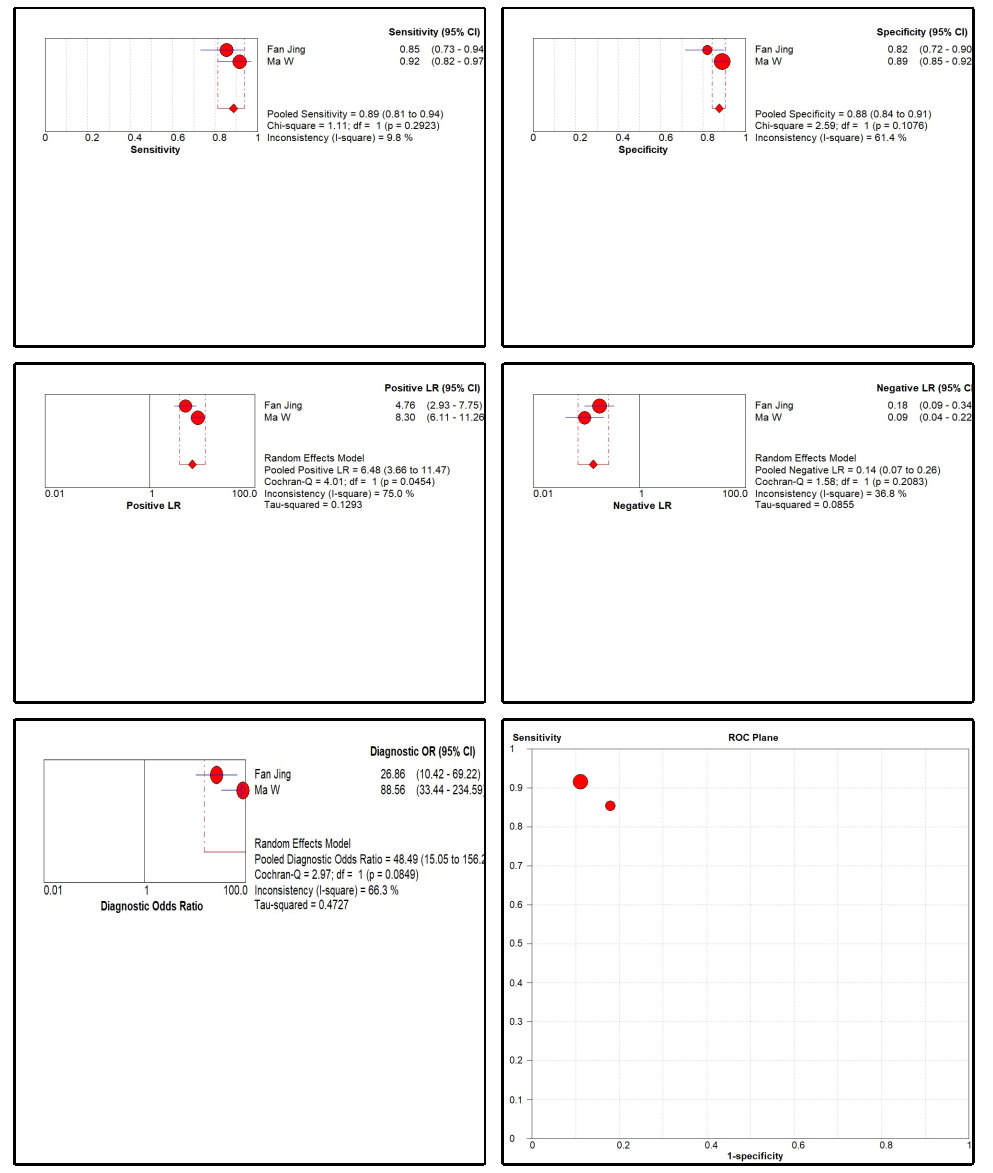


**Supplementary Figure 5.** Forest plots of sensitivity, specificity, PLR, NLR, DOR, SROC curve and ROC Plane for UARR in the diagnosis of PA.
